# Supplementary material for: Nafion-stabilized magnetic nanoparticles (Fe3O4) for [Ru(bpy)3]2+(bpy = bipyridine) electrogenerated chemiluminescence sensor
Source: Royal Society of Chemistry journal article supplement (doi:10.1039/b503358f), 2005-01-01
Supplement: b503358f.pdf [file b503358f.pdf]

## Electronic Supplementary Information

### Nafion-stabilized magnetic nanoparticles ( $\text{Fe}_3\text{O}_4$ ) for $[\text{Ru}(\text{bpy})_3]^{2+}$ (bpy = bipyridine) electrogenerated chemiluminescence sensor

Dong-Jun Kim, Young-Ku Lyu, Han Nim Choi, In-Hong Min and Won-Yong Lee\*

Department of Chemistry and Center for Bioactive Molecular Hybrids, Yonsei University, Seoul 120-749, Republic of Korea, Fax: 82-2-364-7050; Tel: 82-2-2123-2649; E-mail: [wylee@yonsei.ac.kr](mailto:wylee@yonsei.ac.kr)

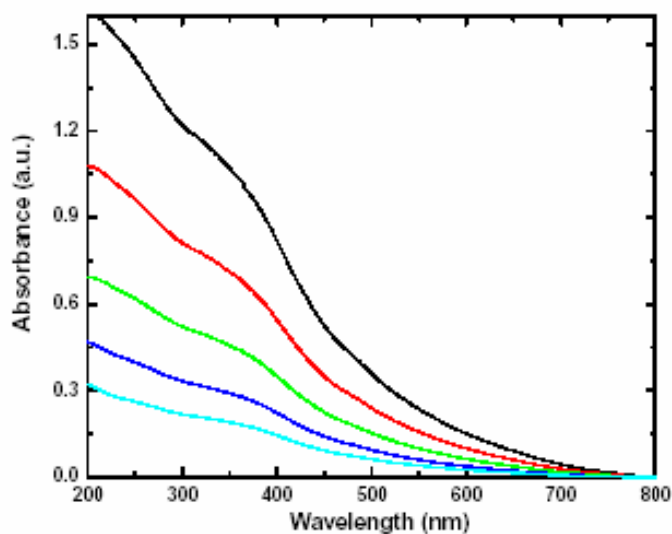

Figure S1. UV-visible absorption spectra of Nafion/ $\text{Fe}_3\text{O}_4$  nanoparticles (1.0 mg/mL water and its successive 3-fold dilutions by water)

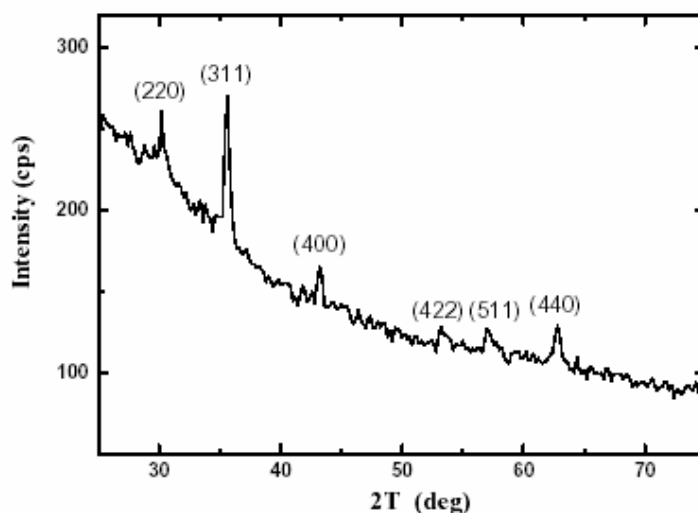

Figure S2. X-ray diffraction spectrum of Nafion/ $\text{Fe}_3\text{O}_4$  nanoparticles.
